# Supplementary material for: PACT-mediated PKR activation acts as a hyperosmotic stress intensity sensor weakening osmoadaptation and enhancing inflammation
Source: eLife journal article supplement (doi:10.7554/elife.52241), 2020-03-16
Supplement: supp [file elife-52241-supp-v1.zip]

Archive with 9 entries (9 files):
- elife_poa_e52241_Transparent_Reporting_File.docx
- elife_poa_e52241_Figure_5_figure_supplement_1.pdf
- elife_poa_e52241_Figure_4_figure_supplement_1.pdf
- elife_poa_e52241_Figure_1_figure_supplement_2.pdf
- elife_poa_e52241_Figure_1_source_data_1.xlsx
- elife_poa_e52241_Figure_1_figure_supplement_1.pdf
- elife_poa_e52241_Figure_2_source_data_1.xlsx
- elife_poa_e52241_Figure_5_source_data_1.xlsx
- elife_poa_e52241_Figure_3_source_data_1.xlsx
