# Supplementary material for: PACT-mediated PKR activation acts as a hyperosmotic stress intensity sensor weakening osmoadaptation and enhancing inflammation
Source: eLife journal article supplement (doi:10.7554/elife.52241), 2020-03-16
Supplement: supp [file elife-52241-supp-v1.zip › elife_poa_e52241_Figure_1_figure_supplement_2.pdf]

Figure 1 Supplement 2

A

B

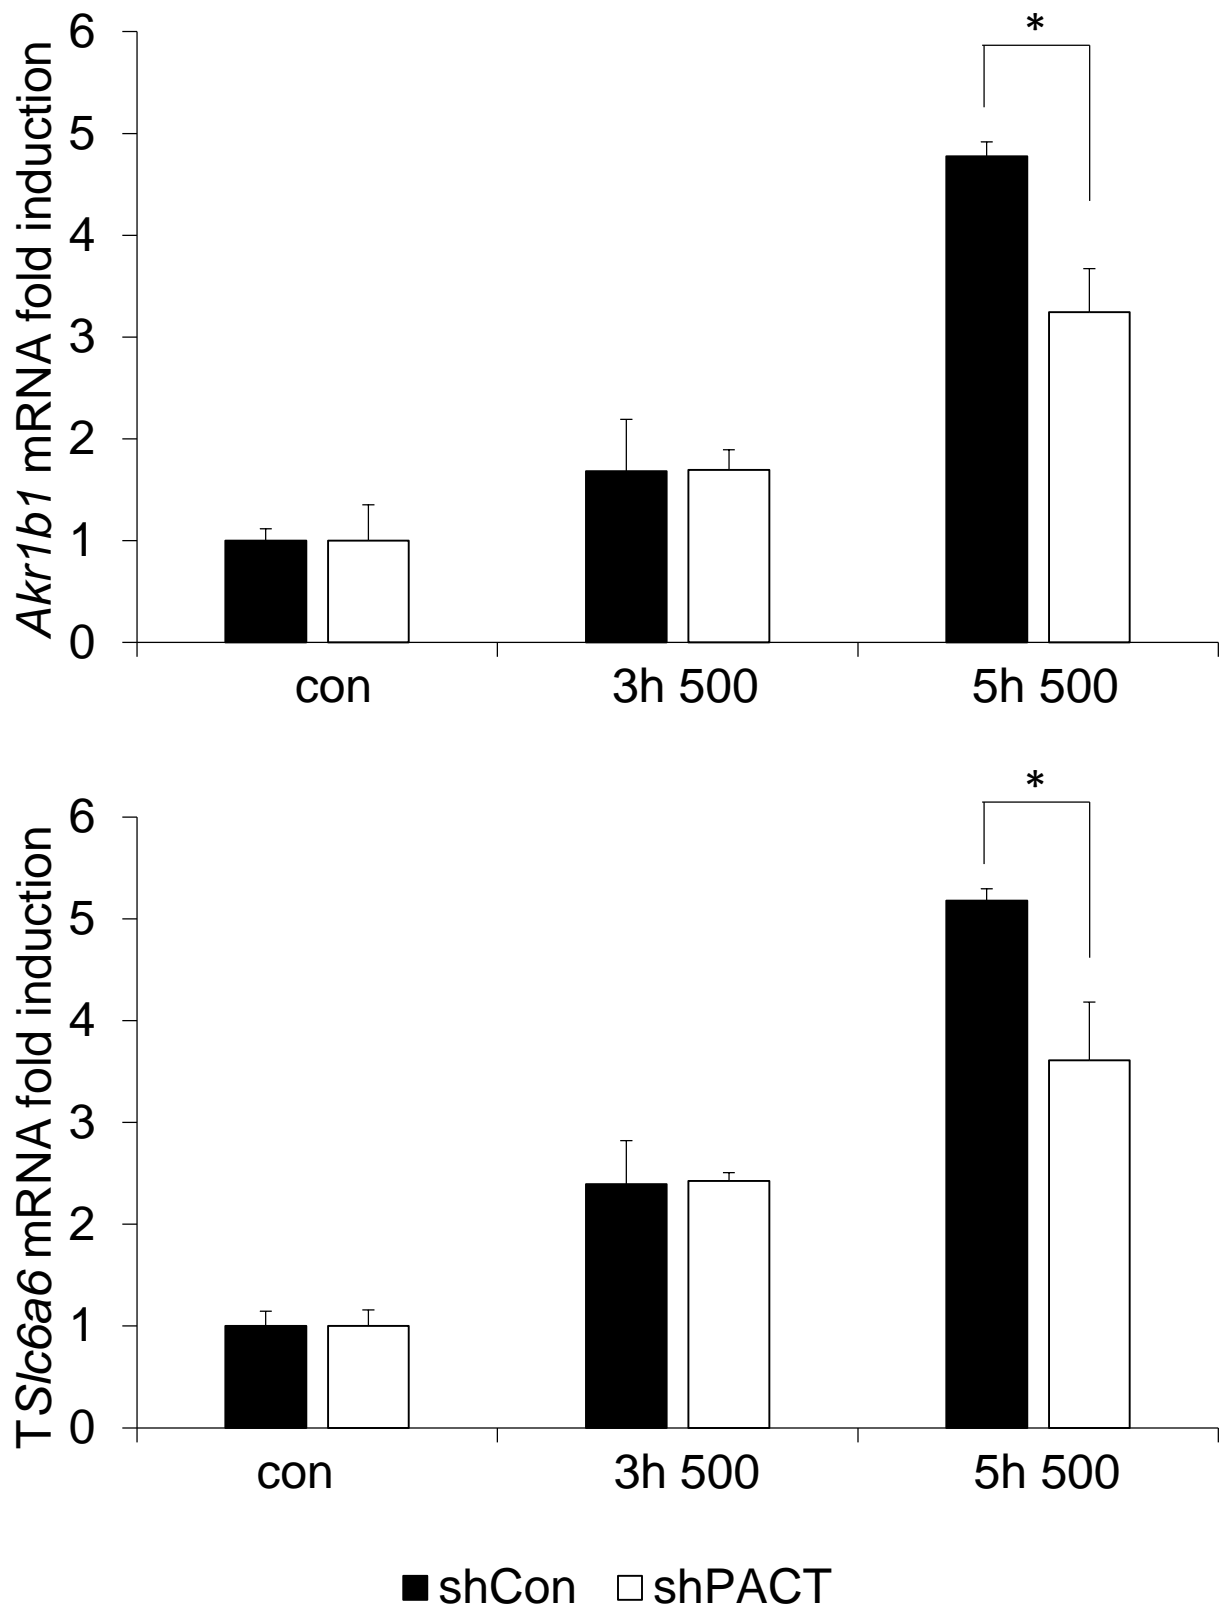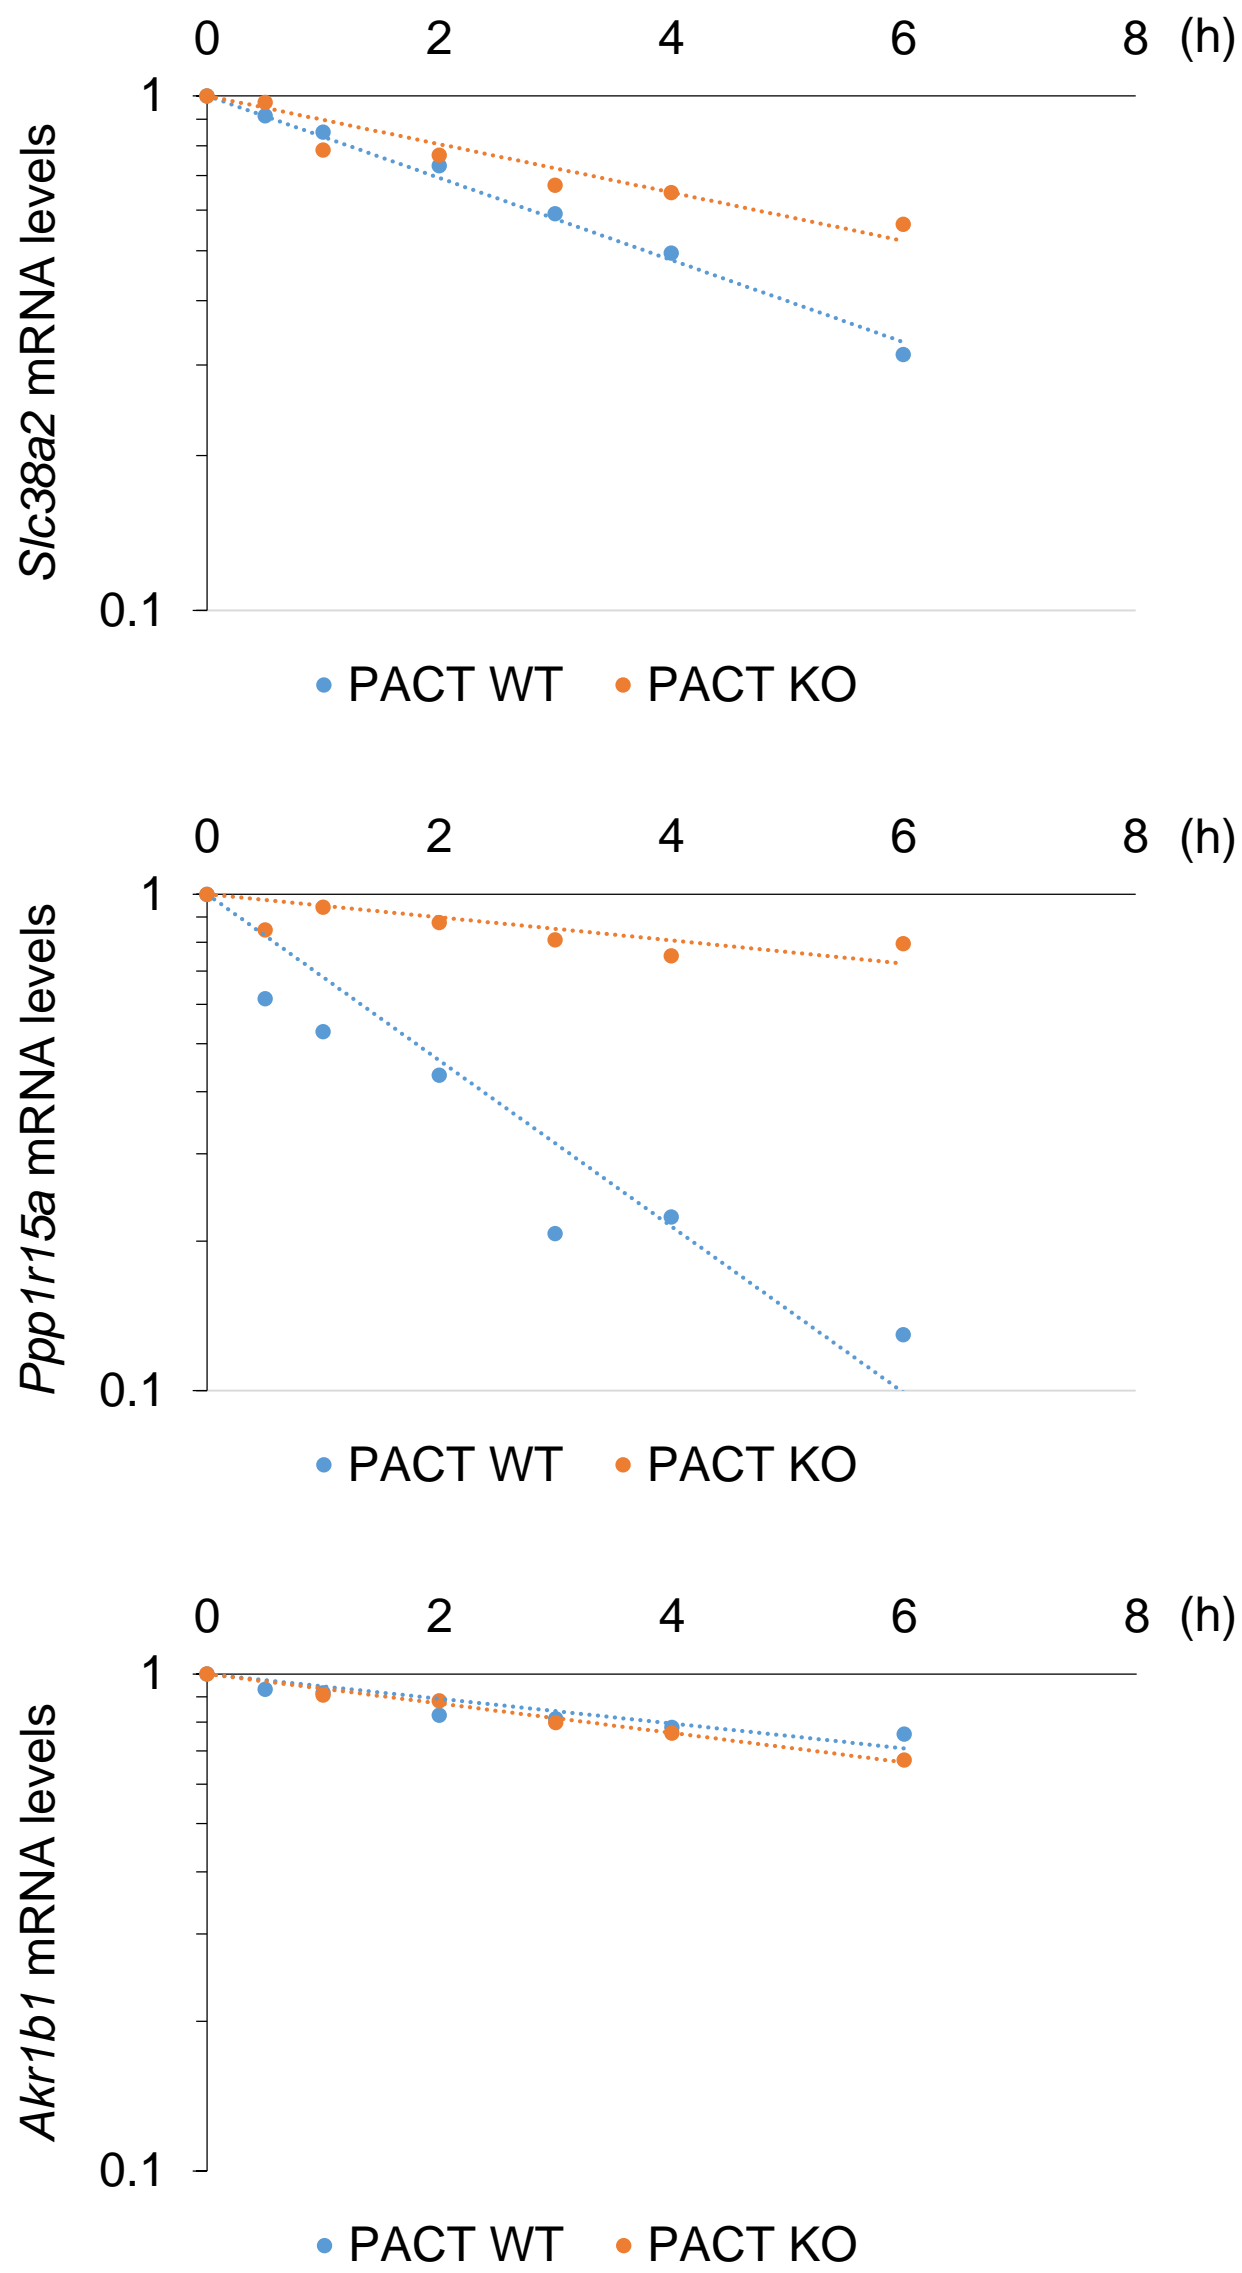

**Figure 1 Supplement 2.** PACT influences the TonEBP-dependent adaptive transcription program. (A) MEFs deficient in PACT were treated with 500 mOsm hyperosmotic media for the indicated durations. Total mRNA was isolated, and target mRNA levels analyzed via RT-qPCR. (B) MEFs deficient in PACT were treated with 500 mOsm hyperosmotic media for 3 h. Actinomycin D was added, and total mRNA was harvested after the indicated duration. mRNA half-life was calculated using linear regression analysis.
