# Supplementary material for: PACT-mediated PKR activation acts as a hyperosmotic stress intensity sensor weakening osmoadaptation and enhancing inflammation
Source: eLife journal article supplement (doi:10.7554/elife.52241), 2020-03-16
Supplement: supp [file elife-52241-supp-v1.zip › elife_poa_e52241_Figure_1_source_data_1.xlsx]

## Sheet: Sheet1
Fig 1D
	shCon	Treatment	Value	StDev	shPACT	Treatment	Value	StDev		p value
		0	1	0.032468		0	1	0.026891
		3h 500	1.02231	0.102231		3h 500	0.993885	0.0993885
		5h 500	1.3346	0.13346		5h 500	1.00302	0.100302
		3h 600	7.21331	0.721331		3h 600	3.11124	0.311124		0.0284729
		5h 600	22.747	0.624692		5h 600	12.538	0.426794		0.00484729
Fig 1E
	iNOS
		shCon	Treatment	Value	StDev	shPACT	Treatment	Value	StDev		p value
			0	1	0.274448		0	1	1.13857
			3h 500	4.42136	0.203054		3h 500	6.0648	1.22446
			5h 500	2.37563	0.214876		5h 500	3.3332	0.258372
			3h 600	7.43823	0.08049		3h 600	4.49787	0.356863		0.069817
			5h 600	18.043	0.979032		5h 600	7.08432	0.234485		0.0037821
	IL6
		shCon	Treatment	Value	StDev	shPACT	Treatment	Value	StDev		p value
			0	1	0.201848		0	1	0.656919
			3h 500	1.36729	0.452121		3h 500	0.519817	0.233871
			5h 500	0.678125	0.097892		5h 500	0.728711	0.361571
			3h 600	1.40185	0.552181		3h 600	0.769178	0.320987
			5h 600	10.4286	0.234519		5h 600	2.21718	0.711717		0.001822
	SNAT2
		shCon	Treatment	Value	StDev	shPACT	Treatment	Value	StDev		p value
			0	1	0.100177		0	1	0.019439
			3h 500	3.23334	0.119779		3h 500	4.09598	0.008847
			5h 500	10.6928	0.037806		5h 500	6.49867	0.003393		0.021859
			3h 600	0.76225	0.071923		3h 600	0.878605	0.012589
			5h 600	1.19333	0.081215		5h 600	0.857001	0.041624
