# Supplementary material for: PACT-mediated PKR activation acts as a hyperosmotic stress intensity sensor weakening osmoadaptation and enhancing inflammation
Source: eLife journal article supplement (doi:10.7554/elife.52241), 2020-03-16
Supplement: supp [file elife-52241-supp-v1.zip › elife_poa_e52241_Figure_2_source_data_1.xlsx]

## Sheet: Sheet1
Fig 2B
	shCon				shPACT
		Treatment	Value	StDev		Treatment	Value	StDev		p value
		0	1	0.017564		0	0.969812	0.062108
		3h 500	1.28	0.043015		3h 500	2.77574	0.015607		0.031871
		5h 500	1.15	0.046		5h 500	5.43	0.2172		0.008167
Fig 2D
	shCon				shc-Rel
		Treatment	Value	StDev		Treatment	Value	StDev		p value
		0	1	0.274448		0	1	0.175433
		3h 500	4.42136	0.203054		3h 500	18.5313	0.674299		0.018289
		5h 500	2.37563	0.214876		5h 500	9.41161	0.184246		0.034771
		3h 600	7.43823	0.08049		3h 600	35.7396	1.46827		0.0058818
		5h 600	18.043	0.979032		5h 600	71.5372	1.06333		0.00041771
Fig 2E
	SNAT2
		TonEBP WT				TonEBP KO
			Treatment	Value	StDev		Treatment	Value	StDev		p value
			0	1	0.026648		0	0.971515	0.029563
			5h 500	10.2382	0.036655		5h 500	1.36626	0.009177		0.0008763
	GADD34
		TonEBP WT				TonEBP KO
			Treatment	Value	StDev		Treatment	Value	StDev		p value
			0	1	0.006038		0	1	0.068133
			5h 500	11.925	0.014832		5h 500	5.61164	0.060067		0.0045218
Fig 2F
	SNAT2
		shCon				shc-Rel
			Treatment	Value	StDev		Treatment	Value	StDev		p value
			0	1	0.062509		0	1	0.121143
			5h 500	5.82788	0.060889		5h 500	1.29037	0.073409		0.003849
			5h 540	8.87365	0.0704		5h 540	1.3332	0.074264		0.00012849
			5h 500	3.91182	0.05419		5h 500	1.9635	0.06061		0.012973
	GADD34
		shCon				shc-Rel
			Treatment	Value	StDev		Treatment	Value	StDev		p value
			0	1	0.035881		0	1	0.298778
			5h 500	2.98178	0.238901		5h 500	0.742111	0.098891
			5h 540	6.22871	0.187683		5h 540	1.02988	0.267817
			5h 500	12.0099	0.438991		5h 500	2.34881	0.003288
Fig 2I
	shCon				shc-Rel
		Treatment	Value %	StDev		Treatment	Value %	StDev		p value
		0	100	7.61817		0	100	19.0583
		5h 500	209.07	33.34		5h 500	130.84	15.85		0.041981
Fig 2J
	shCon				shc-Rel
		Treatment	Value	StDev		Treatment	Value	StDev		p value
		0	1	0.0896468		0	1	0.157525
		5h 500	5.23031	0.448158		5h 500	2.47653	0.323461		0.011762
	TonEBP WT				TonEBP KO
		Treatment	Value	StDev		Treatment	Value	StDev		p value
		0	1	0.178403		0	1	0.158562
		5h 500	2.37775	0.354195		5h 500	1.19056	0.195795		0.039523
Fig 2K
	shCon				shc-Rel
		Treatment	Value	StDev		Treatment	Value	StDev		p value
		0	1	0.140494		0	1	0.0998173
		5h 500	1.66818	0.124075		5h 500	0.935169	0.062595		0.035172
	TonEBP WT				TonEBP KO
		Treatment	Value	StDev		Treatment	Value	StDev		p value
		0	1	0.051065		0	1	0.106283
		5h 500	4.40999	0.0745645		5h 500	1.14763	0.125003		0.002889
