# Supplementary material for: PACT-mediated PKR activation acts as a hyperosmotic stress intensity sensor weakening osmoadaptation and enhancing inflammation
Source: eLife journal article supplement (doi:10.7554/elife.52241), 2020-03-16
Supplement: supp [file elife-52241-supp-v1.zip › elife_poa_e52241_Figure_3_source_data_1.xlsx]

## Sheet: Sheet1
Fig 3A
	shCon				shc-Rel
		Treatment	Value	StDev		Treatment	Value	StDev		p value
		0	1	0.008382		0	1	0.012882
		5h 5%	34.15	0.017829		5h 5%	3.59982	0.032878		0.0002777
		5h 10%	3.61882	0.00073896		5h 10%	0.978299	0.276454
Fig 3D
	SNAT2					GADD34
		Treatment	Value	StDev	p value		Treatment	Value	StDev	p value
		0	1	0.001282			0	1	0.098274
		5h 5%	23.0515	0.008789	0.00045818		5h 5%	20.9328	1.2728	0.0024819
		5h 10%	7.45989	0.038183	0.021839		5h 10%	3.79912	0.034821	0.042891
Fig 3E
	SNAT2					GADD34
		Treatment	Value	StDev			Treatment	Value	StDev	p value
		0	1	0.325662			0	1	0.074185
		5h 400	14.376	0.479467	0.001861		5h 400	7.69203	0.10924	0.0032177
		5h 500	2.46604	0.28435	0.038982		5h 500	6.90828	0.160881	0.008916
		5h 600	1.65617	0.12934			5h 600	2.84588	0.18664	0.0218991
