# Supplementary material for: PACT-mediated PKR activation acts as a hyperosmotic stress intensity sensor weakening osmoadaptation and enhancing inflammation
Source: eLife journal article supplement (doi:10.7554/elife.52241), 2020-03-16
Supplement: supp [file elife-52241-supp-v1.zip › elife_poa_e52241_Figure_4_figure_supplement_1.pdf]

Figure 4 Supplement 1

A

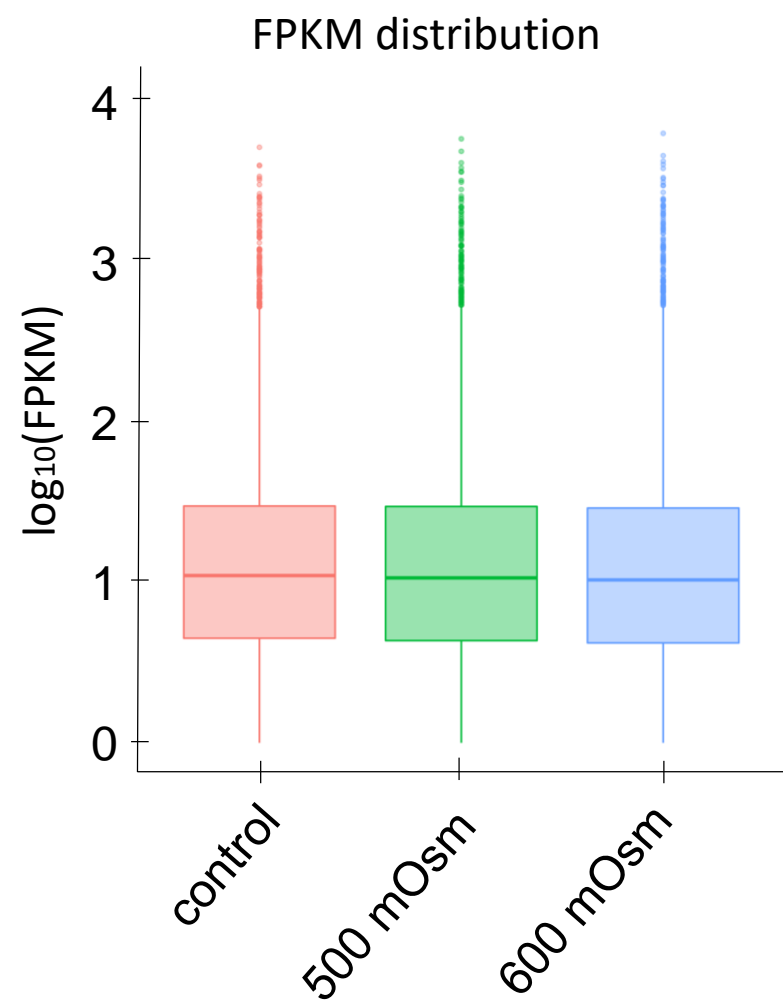

B

KEGG analysis of genes higher in 600 mOsm vs. 500 mOsm

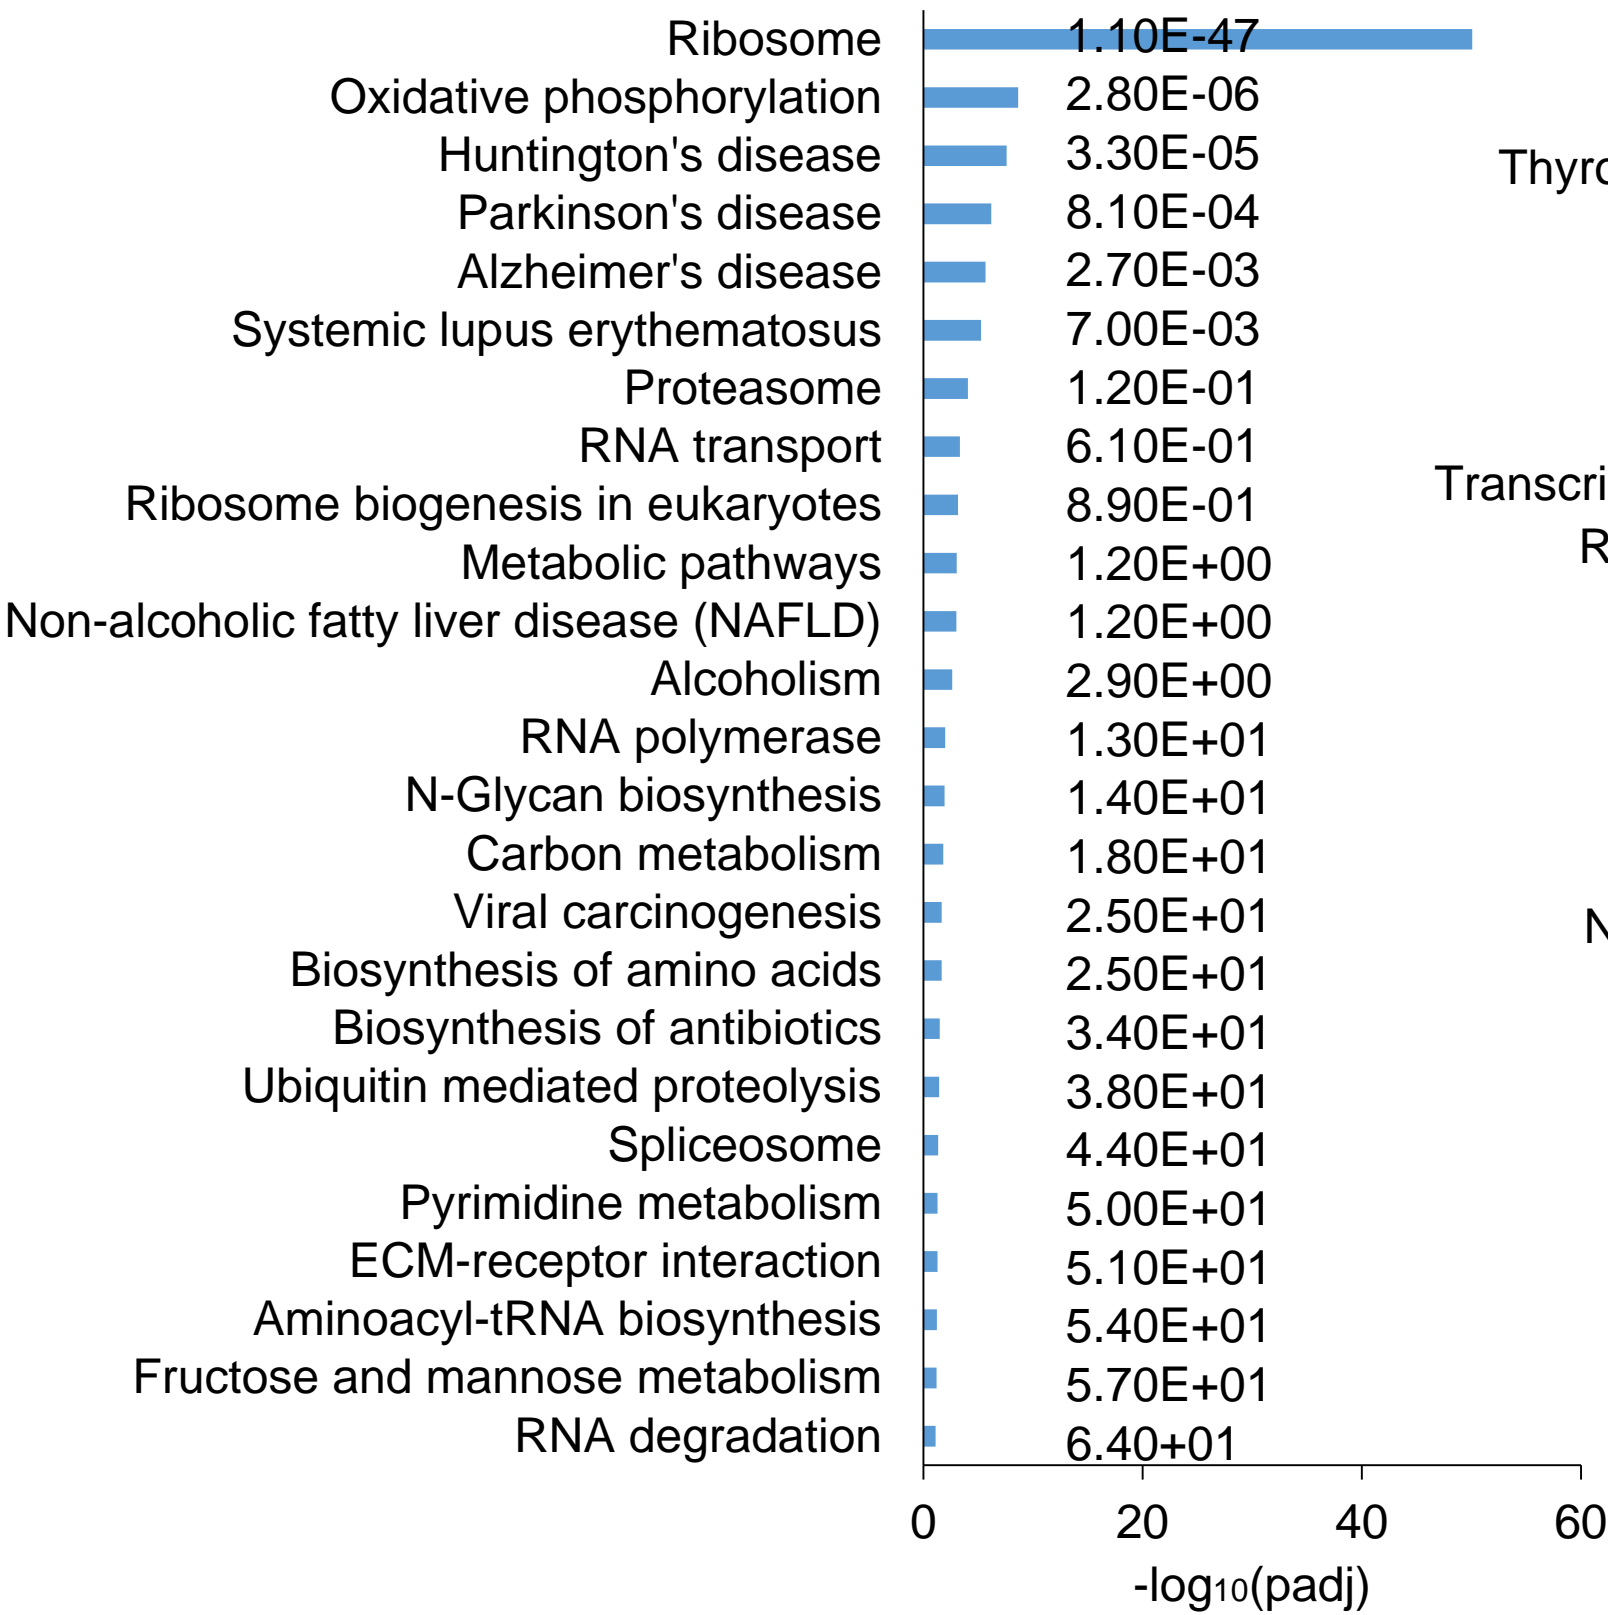

KEGG analysis of genes higher in 500 mOsm vs. 600 mOsm

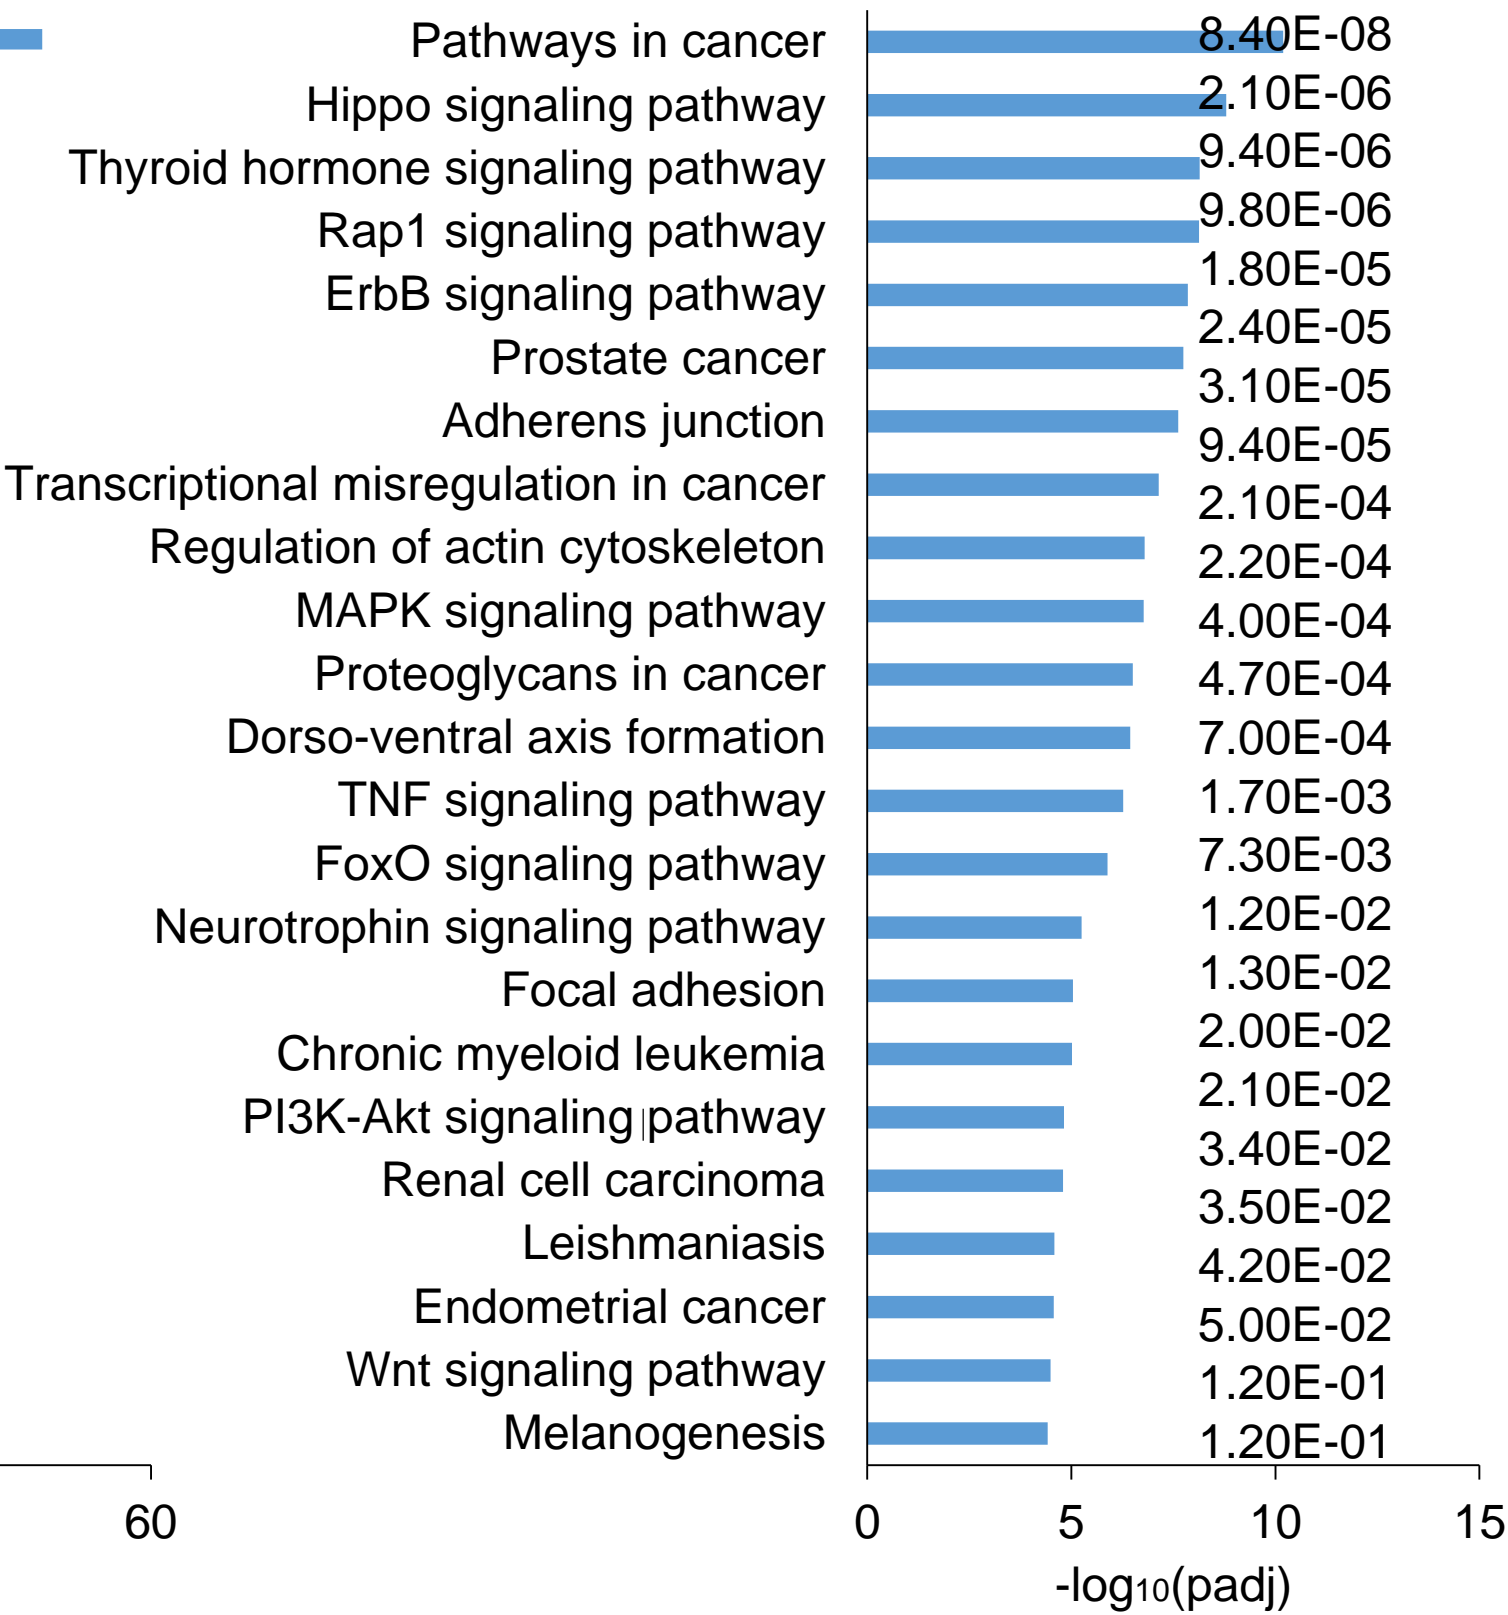

**Figure 4 Supplement 1.** Hyperosmotic stress intensity alters expression of genes involved in ribosomal machinery and cancer signaling pathways. (A) Similar numbers of reads were obtained between treatments with low- and high-intensity hyperosmotic stress. (B) KEGG analysis shows the most common pathways shared between differentially expressed genes under the indicated treatments. Q scores representing false discovery rate (FDR) are reported on the right.
