# Supplementary material for: PACT-mediated PKR activation acts as a hyperosmotic stress intensity sensor weakening osmoadaptation and enhancing inflammation
Source: eLife journal article supplement (doi:10.7554/elife.52241), 2020-03-16
Supplement: supp [file elife-52241-supp-v1.zip › elife_poa_e52241_Figure_5_figure_supplement_1.pdf]

Figure 5 Supplement 1

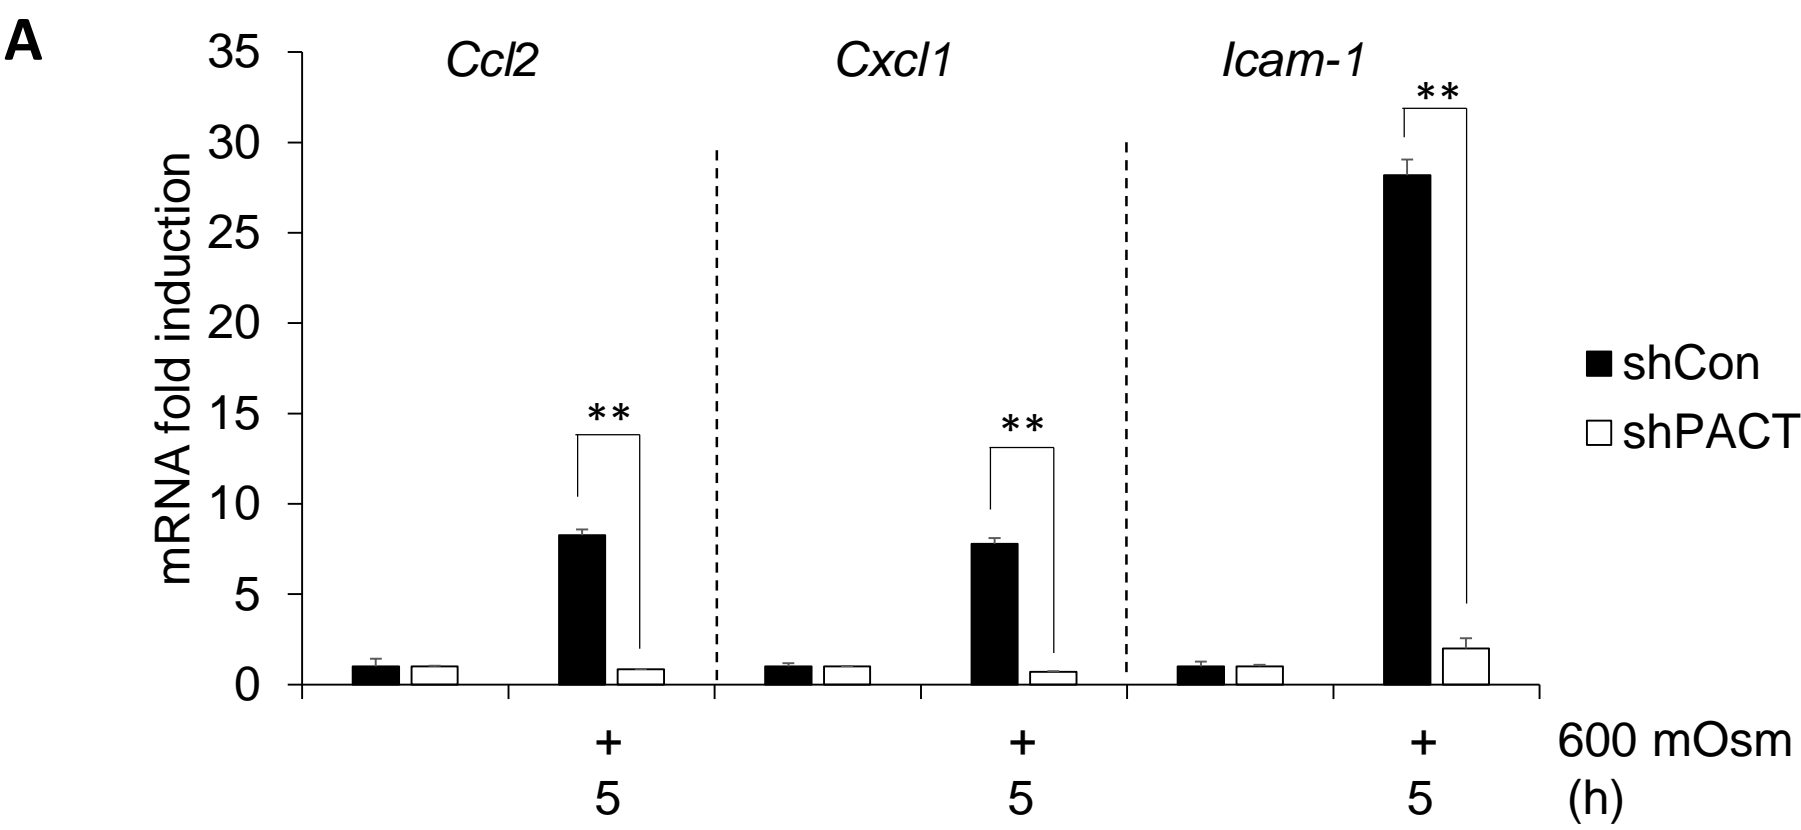

**Figure 5 Supplement 1.** Additional proinflammatory gene expression programs are also dependent on PACT. (A) MEFs deficient in PACT were treated with the indicated stress intensity. RNA was isolated, and mRNA transcript levels analyzed via RT-qPCR.
