# Supplementary material for: PACT-mediated PKR activation acts as a hyperosmotic stress intensity sensor weakening osmoadaptation and enhancing inflammation
Source: eLife journal article supplement (doi:10.7554/elife.52241), 2020-03-16
Supplement: supp [file elife-52241-supp-v1.zip › elife_poa_e52241_Figure_5_source_data_1.xlsx]

## Sheet: Sheet1
Fig 5B
	Hspa1a
		TonEBP WT				TonEBP KO
			Treatment	Value	StDev		Treatment	Value	StDev		p value
			0	1	0.003383		0	1	0.299948
			5h 500	20.4691	0.008317		5h 500	4.79204	0.100592		0.0001287
		shCon				shc-Rel
			Treatment	Value	StDev		Treatment	Value	StDev		p value
			0	1	0.091023		0	1	0.22148
			5h 500	66.6356	0.128659		5h 500	14.5843	0.016434		0.0072819
	Mmp9
		TonEBP WT				TonEBP KO
			Treatment	Value	StDev		Treatment	Value	StDev		p value
			0	1	0.197237		0	1	0.06487
			5h 500	3.67996	0.271809		5h 500	1.19638	0.072967		0.0072918
		shCon				shc-Rel
			Treatment	Value	StDev		Treatment	Value	StDev		p value
			0	1	0.196063		0	1	0.159006
			5h 500	1.78789	0.133941		5h 500	1.00178	0.261418		0.039181
Fig 5C
	Akr1b1
		TonEBP WT				TonEBP KO
			Treatment	Value	StDev		Treatment	Value	StDev		p value
			0	1	0.090916		0	1	0.012771
			5h 500	2.91394	0.00841		5h 500	0.626989	0.057018		0.022564
		shCon				shc-Rel
			Treatment	Value	StDev		Treatment	Value	StDev		p value
			0	1	0.067512		0	1	0.358635
			5h 500	4.43316	0.185241		5h 500	6.8193	0.042407
	Slc6a6
		TonEBP WT				TonEBP KO
			Treatment	Value	StDev		Treatment	Value	StDev		p value
			0	1	0.016225		0	1	0.001919
			5h 500	1.6286	0.091244		5h 500	0.460444	0.097609		0.037181
		shCon				shc-Rel
			Treatment	Value	StDev		Treatment	Value	StDev		p value
			0	1	0.140543		0	1	0.028546
			5h 500	2.01357	0.050383		5h 500	1.91979	0.010353
Fig 5D
	Elf3
		p65 WT				p65 KO
			Treatment	Value	StDev		Treatment	Value	StDev		p value
			0	1	0.071689		0	1	0.0892721
			5h 600	5.39893	0.226602		5h 600		0.038767		0.0006282
		TonEBP WT				TonEBP KO
			Treatment	Value	StDev		Treatment	Value	StDev		p value
			0	1	0.017751		0	1	0.282092
			5h 600	3.20007	0.042961		5h 600	1.58349	0.024931		0.028482
	Irf1
		p65 WT				p65 KO
			Treatment	Value	StDev		Treatment	Value	StDev		p value
			0	1	0.045286		0	1	0.150692
			5h 600	1.4129	0.138736		5h 600	0.829005	0.050709		0.032423
		TonEBP WT				TonEBP KO
			Treatment	Value	StDev		Treatment	Value	StDev		p value
			0	1	0.052966		0	1	0.0849116
			5h 600	1.60629	0.00520213		5h 600	0.552409	0.066013		0.018823
	Tnfrsf9
		p65 WT				p65 KO
			Treatment	Value	StDev		Treatment	Value	StDev		p value
			0	1	0.063283		0	1	0.013059
			5h 600	3.97545	0.185658		5h 600	0.637442	0.199028		0.048889
		TonEBP WT				TonEBP KO
			Treatment	Value	StDev		Treatment	Value	StDev		p value
			0	1	0.320984		0	1	0.073135
			5h 600	5.29211	0.393744		5h 600	0.458143	0.225062		0.0003481
	Il6
		TonEBP WT				TonEBP KO
			Treatment	Value	StDev		Treatment	Value	StDev		p value
			0	1	0.21		0	1	0.463641
			5h 600	6.35	0.43		5h 600	0.913237	0.53824		0.0002181
Fig 5F
	Elf3
		shCon				shPACT
			Treatment	Value	StDev		Treatment	Value	StDev		p value
			0	1	0.128363		0	1	0.1698
			5h 600	1.80999	0.148414		5h 600	1.1011	0.2118		0.047819
	Irf1
		shCon				shPACT
			Treatment	Value	StDev		Treatment	Value	StDev		p value
			0	1	0.129032		0	1	0.10872
			5h 600	2.70638	0.173368		5h 600	0.883807	0.145117		0.02191
	Tnfrsf9
		shCon				shPACT
			Treatment	Value	StDev		Treatment	Value	StDev		p value
			0	1	0.263274		0	1	0.2543
			5h 600	2.08209	0.39743		5h 600	0.7543	0.2437		0.042718
