# Supplementary figures and images for: PACT-mediated PKR activation acts as a hyperosmotic stress intensity sensor weakening osmoadaptation and enhancing inflammation
Source: eLife journal article supplement (doi:10.7554/elife.52241), 2020-03-16

**A**

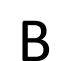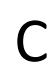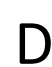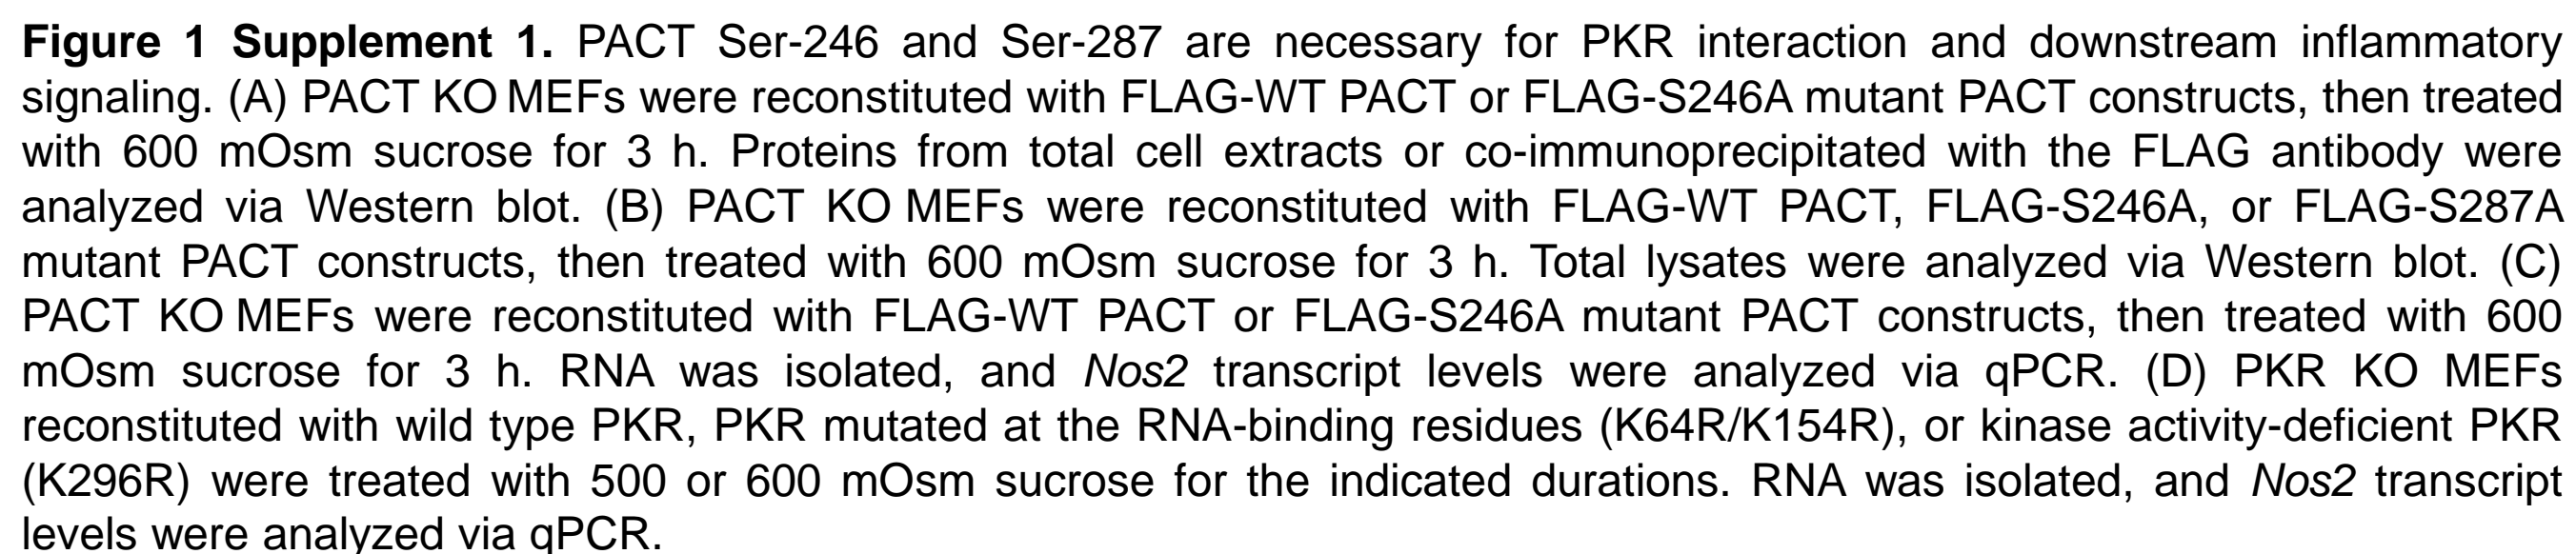

Supplement: supp [file elife-52241-supp-v1.zip › elife_poa_e52241_Figure_1_figure_supplement_1.pdf]
